- Group for Nutrition in Dialysis. *Nephrol Dial Transplant* 1999; 14: 1679–1686
8. Kopple JD. National kidney foundation K/DOQI clinical practice guidelines for nutrition in chronic renal failure. *Am J Kidney Dis* 2001; 37: S66–S70
  9. Fouque D, Vennegoor M, ter Wee P *et al*. EBPG guideline on nutrition. *Nephrol Dial Transplant* 2007; 22: ii45–ii87
  10. Bilbrey GL, Cohen TL. Identification and treatment of protein calorie malnutrition in chronic hemodialysis patients. *Dialysis Transplant* 1989; 18: 669–677
  11. Kalantar-Zadeh K, Kopple JD, Block G *et al*. A malnutrition-inflammation score is correlated with morbidity and mortality in maintenance hemodialysis patients. *Am J Kidney Dis* 2001; 38: 1251–1263
  12. Dessi M, Noce A, Agnoli A *et al*. The usefulness of the prognostic inflammatory and nutritional index (PINI) in a haemodialysis population. *Nutr Metab Cardiovasc Dis* 2009; 19: 811–815
  13. Beberashvili I, Azar A, Sinuani I *et al*. Objective Score of Nutrition on Dialysis (OSND) as an alternative for the malnutrition-inflammation score in assessment of nutritional risk of haemodialysis patients. *Nephrol Dial Transplant* 2010; 25: 2662–2671
  14. Fiedler R, Jehle PM, Osten B *et al*. Clinical nutrition scores are superior for the prognosis of haemodialysis patients compared to lab markers and bioelectrical impedance. *Nephrol Dial Transplant* 2009; 24: 3812–3817
  15. Penne EL, Blankestijn PJ, Bots ML *et al*. Effect of increased convective clearance by on-line hemodiafiltration on all cause and cardiovascular mortality in chronic hemodialysis patients - the Dutch CONvective TRANsport STudy (CONTRAST): rationale and design of a randomised controlled trial [ISRCTN38365125]. *Curr Control Trials Cardiovasc Med* 2005; 6: 8
  16. Klungel OH, Martens EP, Psaty BM *et al*. Methods to assess intended effects of drug treatment in observational studies are reviewed. *J Clin Epidemiol* 2004; 57: 1223–1231
  17. Daugirdas JT. Second generation logarithmic estimates of single-pool variable volume Kt/V: an analysis of error. *J Am Soc Nephrol* 1993; 4: 1205–1213
  18. Depner TA, Daugirdas JT. Equations for normalized protein catabolic rate based on two-point modeling of hemodialysis urea kinetics. *J Am Soc Nephrol* 1996; 7: 780–785
  19. Detsky AS, McLaughlin JR, Baker JP *et al*. What is subjective global assessment of nutritional status? *JPEN J Parenter Enteral Nutr* 1987; 11: 8–13
  20. Donders AR, van der Heijden GJ, Stijnen T *et al*. Review: a gentle introduction to imputation of missing values. *J Clin Epidemiol* 2006; 59: 1087–1091
  21. de Mutsert R, Grootendorst DC, Boeschoten EW *et al*. Subjective global assessment of nutritional status is strongly associated with mortality in chronic dialysis patients. *Am J Clin Nutr* 2009; 89: 787–793
  22. Liu Y, Coresh J, Eustace JA *et al*. Association between cholesterol level and mortality in dialysis patients: role of inflammation and malnutrition. *JAMA* 2004; 291: 451–459
  23. Huang CX, Tighiouart H, Beddhu S *et al*. Both low muscle mass and low fat are associated with higher all-cause mortality in hemodialysis patients. *Kidney Int* 2010; 77: 624–629
  24. Cooper BA, Bartlett LH, Aslani A *et al*. Validity of subjective global assessment as a nutritional marker in end-stage renal disease. *Am J Kidney Dis* 2002; 40: 126–132

Received for publication: 11.5.10; Accepted in revised form: 24.9.10

*Nephrol Dial Transplant* (2011) 26: 1967–1976

doi: 10.1093/ndt/gfq652

Advance Access publication 27 October 2010

## Association of abdominal visceral adiposity and thigh sarcopenia with changes of arteriosclerosis in haemodialysis patients

Akihiko Kato<sup>1</sup>, Junko Ishida<sup>2</sup>, Yukino Endo<sup>2</sup>, Takako Takita<sup>3</sup>, Mitsuyoshi Furuhashi<sup>3</sup>, Yukitaka Maruyama<sup>3</sup> and Mari Odamaki<sup>2</sup>

<sup>1</sup>Division of Blood Purification, Hamamatsu University School of Medicine, Hamamatsu 431-3192, Japan, <sup>2</sup>Faculty of Health Promotional Sciences, Department of Health and Nutritional Sciences, Hamamatsu University, Hamamatsu 431-2102, Japan and <sup>3</sup>Maruyama Hospital, Hamamatsu 430-0903, Japan

Correspondence and offprint requests to: Akihiko Kato; E-mail: a.kato@hama-med.ac.jp

### Abstract

**Background.** In haemodialysis (HD) patients, abdominal visceral fat is accumulated while lean body mass is decreased irrespective of their body mass indexes (BMI). However, it is poorly understood which changes of fat and muscle masses are more associated with changes of arteriosclerosis. We aimed at examining the associations of abdominal visceral fat and thigh muscle masses with markers of

arteriosclerosis in chronic HD patients in a cross-sectional fashion.

**Patients and Methods.** We measured abdominal visceral fat mass area (AVFA), abdominal subcutaneous fat mass area (ASFA), thigh muscle area (TMA) and TMA standardized for femoral shaft area (TMA/FSA) by computed tomography (CT) in 161 HD patients (age: 61 ± 11 years, time on HD: 12 ± 10 years, male/female = 113/48, non-

diabetes/diabetes = 127/34). We also investigated carotid artery intima-media thickness (CA-IMT) using the ultrasound instrument, and brachial-ankle pulse wave velocity (baPWV), cardio-ankle vascular index (CAVI) and ankle-brachial pressure index (ABI) using the waveform device (CAVI-VaSera VS-1000).

**Results.** AVFA was significantly and positively related to CA-IMT in both non-diabetic ( $r = 0.23$ ,  $P < 0.05$ ) and diabetic HD patients ( $r = 0.38$ ,  $P < 0.05$ ). There was a significant and positive correlation between AVFA and hs-CRP in all patients ( $r = 0.26$ ,  $P < 0.01$ ). ASFA was also significantly correlated with CA-IMT ( $r = 0.53$ ,  $P < 0.01$ ) in diabetic HD patients. TMA/SFA ratio was negatively associated with CA-IMT ( $r = -0.21$ ,  $P < 0.05$ ), while positively with ABI ( $r = 0.28$ ,  $P < 0.01$ ) in non-diabetic patients. TMA/SFA ratio was inversely related to baPWV ( $r = -0.41$ ,  $P < 0.01$ ) and CAVI ( $r = -0.41$ ,  $P < 0.05$ ) in diabetic HD patients. Multiple regression analysis revealed that AVFA was a significant determinant of CA-IMT. TMA/AFA was also significantly associated with CA-IMT, baPWV, CAVI and ABI.

**Conclusion.** Accumulated abdominal visceral fat is associated with CA-IMT. In addition, reduced thigh muscle mass area is independently related to CA-IMT, baPWV, CAVI and ABI, suggesting that sarcopenia in the leg is closely associated with systemic changes of arteriosclerosis in HD patients.

**Keywords:** abdominal visceral fat; arterial stiffness; carotid artery IMT; haemodialysis; thigh muscle

## Introduction

Changes of body composition such as decreased muscle mass volume and increased fat mass volume are observed in patients with chronic kidney disease (CKD) [1,2]. By using computed tomography (CT), Odamaki *et al.* [1] demonstrated that abdominal visceral fat mass area (AVFA) adjusted by body mass index (BMI) was significantly higher, while abdominal subcutaneous fat mass area (ASFA) adjusted by BMI was rather lower in non-diabetic haemodialysis (HD) patients when compared with the age-matched control subjects. A decrease in abdominal muscle area is also observed in HD patients when compared with the age-matched healthy controls in each sex [2].

Recently, increased fat mass is reported to be associated with arteriosclerotic changes. Increased AVFA is independently associated with carotid artery intima-media thickness (CA-IMT) and carotid plaque area in healthy [3] and type 2 diabetes subjects [4]. Abdominal obesity is also associated with carotid-femoral pulse wave velocity (PWV) in the elderly [5].

Lower muscle is also associated with arteriosclerotic markers in the general population. Femoral muscle area is a strong determinant of ankle-brachial pressure index (ABI) [6]. Calf circumference is inversely related to carotid plaques in elderly subjects [7]. Reduced thigh muscle area (TMA) is also associated with brachial-ankle PWB (baPWV) in middle-aged to elderly men [8].

In CKD patients, most studies have demonstrated that higher BMI may be related to lower all-cause and cardiovascular mortality [9,10]. However, BMI does not differentiate between fat and muscle mass. So, it remains to be fully determined which changes of fat and muscle masses are associated with arteriosclerotic changes in HD patients.

The main aim of the present study was to evaluate more in detail the causative association of arteriosclerotic changes with fat and muscle masses in CKD patients requiring HD. We assessed abdominal adiposity and femoral muscle area by CT scan and tested whether these anthropometric parameters are associated with several markers of arteriosclerosis, including CA-IMT, carotid artery plaques, baPWV, cardio-ankle vascular index (CAVI), ABI and the percentile of aortic calcification area (%ACA).

## Materials and methods

### Subjects

We first enrolled 215 patients who had been undergoing regular HD in a single dialysis centre (Maruyama Hospital, Hamamatsu, Japan). We excluded totally the 54 patients who had not given their consensus, who were older than 80 years, who had been suffering from advanced cancer or who did not undergo all measurements. So, in total, we included 161 patients. The diagnosis of cardiovascular disease (CVD) (history of myocardial infarction, angina pectoris, stroke or peripheral arterial disease) or diabetes mellitus (DM), the presence of traditional major cardiovascular risk factors and drug prescription were recorded from the medical charts and analysed. The study was approved by the ethics committee of the institution. All patients gave their consent to participate in the study.

All patients had been subjected to regular HD for 4–5 h three times per week at a blood flow rate of 180–250 mL/min. All patients used bicarbonate dialysate (30 mEq/L, Kindaly AF-2P, Fuso, Osaka, Japan) at a dialysate flow rate of 500 mL/min. No bacteria or pyrogen was detected in the dialysate fluid obtained by reverse osmosis. Using an endotoxin removal filter, the endotoxin concentration in dialysate was below 0.05 EU/mL with a Limulus amoebocyte lysate assay (Wako Junyaku endotoxin measurement kit, Tokyo, Japan).

### Blood sampling and laboratory examinations

Blood samples were drawn from the arterial site of the arteriovenous fistula at the start of each dialysis session after the 2-day interval. Serum electrolytes, urea nitrogen, creatinine, albumin, cholesterol and triglyceride were measured by standard laboratory techniques using an autoanalyser. Intact parathyroid hormone (PTH) was determined by immunoradiometric assay. Highly sensitive C-reactive protein (hs-CRP) was measured by latex photometric immunoassay (Wako Junyaku, Tokyo, Japan). BMI was calculated dividing dry weight (kg) by body height (m)<sup>2</sup>.

### Measurements of muscle and fat areas by CT

Axial CT images of the abdomen were obtained at the level of the third lumbar spine just before an HD session. The thickness of a slice was 10 mm. The radiographic images were digitally scanned for analysis by a personal computer. ASFA and AVFA were measured with use of the public domain planimetry programme, The National Institutes of Health IMAGE (written by Wayne Rasband, The National Institutes of Health, Bethesda, MD, USA). We diagnosed the patients as having visceral fat obesity if AVFA exceeded 100 cm<sup>2</sup> [11].

TMA was determined at the midpoint of a line extending from the superior border of the patella to the greater trochanter of the femur. We standardized TMA divided by femoral shaft area (TMA/FSA ratio) to avoid the influence of body size, which is shown as a strong determinant of muscle volume [12]. TMA/FSA ratio < 10.0 is reported to well reflect malnourished status, while those with a value of > 13.0 indicate well nourishment in HD patients [12]. We also assessed %ACA by measuring the calcified area of scanned abdominal aorta [13].

*Measurements CA-IMT*

CA-IMT is a well known predictor of mortality in HD patients [14]. In this study, we investigated the bilateral carotid arteries in longitudinal projections using the ultrasound instrument (Hitachi EUB7000HV, Tokyo, Japan) in a supine position. The examination included sections of ~2–3 cm of common carotid artery just below the carotid bulb. The IMT was defined as the distance between the leading edge of the first echographic line (lumen-intima interface) and the second echographic line (media-adventitia interface) of the far wall. Plaque was defined as IMT larger than 1.0 mm. Mean and maximal CA-IMT at the 2-cm width of the posterior wall without plaque formation were calculated automatically. We also measured the maximal diameter of plaque at both common carotid arteries. IMT ultrasound studies were performed by the same investigator who was blinded to the patient's clinical and laboratory data.

*Measurements of ABI, baPWV and CAVI*

Recently, baPWV and ABI were shown as predictors of mortality in HD patients [15]. CAVI has been developed as a new index of arterial stiffness to overcome the influence of systemic blood pressure during measurement [16]. In this study, we measured baPWV, CAVI and ABI in supine position at rest for at least 10 min. We applied cuffs at the four extremities and monitored electrocardiogram and heart sounds during the measurement. PWV from the heart to the ankle was obtained by calculating the superficial path lengths from the elbow to the suprasternal notch (Da) and from the suprasternal notch to the femur to the ankle (Db) based on anthropometric data for the Japanese population. We measured the time interval between the initial increase in brachial and tibial waveforms (Ta) and obtained baPWV as follows:  $\text{baPWV} = (\text{Db} - \text{Da}) / \text{Ta}$ .

CAVI is calculated using the formula:  $a [\rho / \Delta P [\ln \text{Ps} / \text{Pd}] \text{ca-PWV}^2] + b$  ( $a, b$ , constant;  $\rho$ , blood density;  $\Delta P$ , difference in systolic and diastolic pressure; Ps, systolic pressure; Pd, diastolic pressure; PWV, heart-ankle pulse wave velocity) [15].

All measurements and calculations were made together and automatically in CAVI-VaSera VS-1000 (Fukuda Denshi Co, Ltd, Tokyo, Japan). We repeatedly measured these parameters at both legs in each patient and expressed those as the means. Referred ranges of these markers in control subjects are baPWV lower than 14.0 m/s, CAVI <8.0 and ABI from 0.9 to 1.2 [15,16].

*Statistical analysis*

Values were expressed as the means  $\pm$  standard deviation (SD). The Chi-square test was used for categorical variables including gender, underlying kidney disease, prevalence of CVD and smoking habits. Univariate correlations between anthropometric parameters with laboratory variables were tested using Spearman rank correlation coefficient for continuous variables. Differences between two groups were analysed by an unpaired Student *t*-test following the analysis of variance (ANOVA). One-way factorial ANOVA was conducted using Bonferroni/Dunn test.

We divided all patients into the three tertiles according to their AVFA and AMA/FSA ratio [AVFA: AVFA <40 ( $n = 55$ ),  $40 \leq$  AVFA <100 ( $n = 54$ ), AVFA  $\geq$  100  $\text{cm}^2$  ( $n = 52$ ), AMA/FSA ratio: AMA/FSA ratio <8.6 ( $n = 54$ ),  $8.6 \leq$  AMA/FSA ratio <10.4 ( $n = 53$ ), AMA/FSA ratio  $\geq$  10.4 ( $n = 54$ )] and compared mean CA-IMT between groups.

We examined the determinants of CA-IMT, PWV, CAVI and ABI with multiple stepwise regression analysis. We analysed the following clinical and laboratory parameters: age, time on HD, diabetes, serum calcium, phosphorous, albumin, total cholesterol, HDL cholesterol, triglyceride, haemoglobin, intact PTH, log-transformed hs-CRP, mean arterial pressure (MAP), AVFA, ASFA and TMA/SFA ratio. Since CRP was highly skewed, we naturally log-transformed those before analysis. All statistical calculations were performed with StatView 5J software (SAS Institute, USA).

**Results***Clinical profiles*

Table 1 presents characteristics of the study population. The average age was  $61 \pm 11$  years, with a mean time

on HD for  $12 \pm 10$  years. The underlying kidney diseases were chronic glomerulonephritis ( $n = 89$ ), diabetic nephropathy ( $n = 34$ ), polycystic kidney disease ( $n = 10$ ), benign nephrosclerosis ( $n = 5$ ), malignant hypertension ( $n = 3$ ), others ( $n = 11$ ) and unknown ( $n = 9$ ).

The prevalence of AVFA greater than 100  $\text{cm}^2$  was significantly higher in male than in female (37.2 vs 20.8%,  $P < 0.05$ ). AVFA and ASFA were significantly lower in patients taking angiotensin-converting enzyme inhibitor (ACEI) or angiotensin II receptor blocker (ARB) ( $n = 52$ ) than in those not taking ( $n = 109$ ) (AVFA:  $57.5 \pm 53.7$  vs  $95.0 \pm 71.0$   $\text{cm}^2$ , ASFA:  $137.1 \pm 65.6$  vs  $107.7 \pm 54.2$   $\text{cm}^2$ ,  $P < 0.01$ ).

*Correlations between body composition and nutritional parameters*

AVFA was significantly and positively correlated with serum creatinine ( $P < 0.01$ ), triglyceride ( $P < 0.01$ ), prealbumin ( $P < 0.05$ ) and TMA ( $P < 0.01$ ) in all patients (Table 2). AVFA was also positively associated with log-transformed hs-CRP ( $P < 0.01$ ), though negatively with HDL cholesterol ( $P < 0.01$ ). ASFA was significantly and inversely correlated with age ( $P < 0.05$ ) and time on HD ( $P < 0.05$ ). A significant association was found between ASFA and LDL cholesterol and prealbumin ( $P < 0.05$ ). There was a significant and negative relationship between TMA/FSA ratio and age and time on HD ( $P < 0.01$ ). TMA/FSA ratio was also positively associated with nutritional parameters such as serum creatinine, albumin and prealbumin ( $P < 0.01$ ).

*Associations of anthropometric CT measurements with markers of arteriosclerosis*

AVFA was significantly and positively correlated with mean CA-IMT in non-diabetic ( $r = 0.23$ ,  $P < 0.05$ ) and in diabetic HD patients ( $r = 0.38$ ,  $P < 0.05$ ), respectively (Figure 1). ASFA was significantly and positively correlated with mean CA-IMT ( $r = 0.53$ ,  $P < 0.01$ ) in diabetic HD patients (Figure 1). There was a significantly greater mean and maximal CA-IMT in patients with AVFA higher than 100  $\text{cm}^2$  than that <100  $\text{cm}^2$  both in non-DM and DM groups (Figure 2). In contrast, AVFA ( $r = 0.08$ ,  $P = 0.39$ ) and ASFA ( $r = 0.01$ ,  $P = 0.95$ ) were not associated with maximal plaque diameter in all patients.

TMA did not associate with CA-IMT both in non-diabetic and diabetic patients. However, TMA/FSA ratio was significantly and inversely associated with mean CA-IMT in non-diabetic patients ( $r = -0.21$ ,  $P < 0.05$ ) (Figure 3).

TMA/FSA ratio was also significantly and negatively correlated with baPWV ( $P < 0.05$ ), CAVI ( $P < 0.05$ ) and ABI ( $P < 0.01$ ) in all patients (Table 3). TMA/FSA ratio was associated with ABI ( $P < 0.01$ ) in non-diabetic patients. In diabetic patients, TMA/FSA ratio was related to baPWV and CAVI ( $P < 0.05$ ). There was no relation between TMA/SFA ratio and %ACA in all patients.

When the patients were divided into the three groups according to their AVFA and TMA/FSA ratio, mean level of CA-IMT was the most prominent in the group with the top tertile of AVFA ( $\geq 100$   $\text{cm}^2$ ) and the bottom tertile of TMA/

**Table 1.** Characteristics of the patients with and without DM

|                             | All          | Non-DM       | DM           | Non-DM vs DM |
|-----------------------------|--------------|--------------|--------------|--------------|
| <i>n</i>                    | 161          | 127          | 34           |              |
| Age (years)                 | 61 ± 11      | 64 ± 10      | 60 ± 11      | 0.09         |
| HD vintage (years)          | 12 ± 10      | 13 ± 10      | 6 ± 8        | <0.01        |
| Male/female                 | 113/48       | 85/42        | 28/6         | 0.09         |
| ACEI/ARB (%)                | 32           | 24           | 62           | <0.01        |
| CVD history (%)             | 20           | 17           | 35           | <0.05        |
| Smoker (%)                  | 21           | 21           | 23           | 0.87         |
| Laboratory parameters       |              |              |              |              |
| Creatinine (mg/dL)          | 12.18 ± 3.12 | 12.43 ± 3.17 | 11.24 ± 2.75 | <0.05        |
| Calcium (mg/dL)             | 9.0 ± 0.9    | 9.1 ± 0.9    | 8.9 ± 0.8    | 0.50         |
| Phosphorous (mg/dL)         | 5.7 ± 1.5    | 5.8 ± 1.6    | 5.5 ± 1.4    | 0.44         |
| Intact PTH (pg/mL)          | 235 ± 207    | 245 ± 220    | 200 ± 144    | 0.27         |
| Total cholesterol (mg/dL)   | 154 ± 37     | 156 ± 37     | 145 ± 39     | 0.13         |
| LDL-C (mg/dL)               | 95 ± 33      | 96 ± 33      | 92 ± 31      | 0.49         |
| HDL-C (mg/dL)               | 49 ± 15      | 51 ± 15      | 44 ± 14      | <0.05        |
| Triglyceride (mg/dL)        | 108 ± 62     | 108 ± 62     | 103 ± 55     | 0.71         |
| Albumin (g/dL)              | 3.7 ± 0.3    | 3.7 ± 0.3    | 3.7 ± 0.3    | 0.83         |
| Prealbumin (mg/dL)          | 29 ± 8       | 29 ± 8       | 27 ± 8       | 0.17         |
| Hs-CRP (mg/L)               | 6.5 ± 20.4   | 5.9 ± 17.8   | 8.8 ± 28.3   | 0.47         |
| Haemoglobin (g/dL)          | 10.8 ± 1.2   | 10.9 ± 1.2   | 10.4 ± 1.4   | <0.05        |
| Anthropometric parameters   |              |              |              |              |
| BMI (kg/m <sup>2</sup> )    | 20.7 ± 2.8   | 20.6 ± 2.7   | 21.0 ± 3.2   | 0.49         |
| AVFA (cm <sup>2</sup> )     | 83.3 ± 68.2  | 81.4 ± 65.9  | 90.4 ± 76.6  | 0.49         |
| ASFA (cm <sup>2</sup> )     | 127.8 ± 63.6 | 127.1 ± 62.7 | 130.1 ± 67.7 | 0.81         |
| AVFA/ASFA ratio             | 0.62 ± 0.38  | 0.62 ± 0.38  | 0.62 ± 0.39  | 0.97         |
| TMA (cm <sup>2</sup> )      | 180.8 ± 57.4 | 181.8 ± 59.7 | 177.0 ± 48.3 | 0.67         |
| TMF/FSA ratio               | 9.7 ± 3.2    | 9.8 ± 3.3    | 9.3 ± 2.6    | 0.39         |
| Markers of arteriosclerosis |              |              |              |              |
| Systolic BP (mm Hg)         | 138 ± 28     | 132 ± 26     | 158 ± 29     | <0.01        |
| Diastolic BP (mm Hg)        | 80 ± 14      | 80 ± 15      | 81 ± 12      | 0.62         |
| Pulse pressure (mm Hg)      | 58 ± 21      | 53 ± 16      | 77 ± 302     | <0.01        |
| Mean IMT (mm)               | 0.63 ± 0.12  | 0.63 ± 0.11  | 0.66 ± 0.13  | 0.10         |
| Maximal IMT (mm)            | 0.80 ± 0.16  | 0.80 ± 0.16  | 0.82 ± 0.16  | 0.42         |
| Prevalence of plaque (%)    | 68.9         | 74.0         | 58.8         | 0.09         |
| Plaque diameter (mm)        | 2.8 ± 1.5    | 2.8 ± 1.4    | 2.7 ± 1.7    | 0.80         |
| baPWV (m/s)                 | 14.0 ± 2.1   | 13.7 ± 2.6   | 15.3 ± 2.7   | <0.01        |
| CAVI                        | 9.1 ± 2.4    | 8.6 ± 2.0    | 10.8 ± 3.0   | <0.01        |
| ABI                         | 1.05 ± 0.16  | 1.06 ± 0.15  | 1.00 ± 0.21  | 0.11         |
| %ACA (%)                    | 29 ± 23      | 29 ± 24      | 29 ± 22      | 0.94         |

Abbreviations: DM, diabetes mellitus; HD, haemodialysis; ACEI, angiotensin-converting enzyme inhibitor; ARB, angiotensin II receptor blocker; CVD, cardiovascular disease; PTH, parathyroid hormone; Hs-CRP, highly sensitive C-reactive protein; BMI, body mass index; AVFA, abdominal visceral fat area; ASFA, abdominal subcutaneous fat area; TMA, thigh muscle area; FSA, femoral shaft area; BP, blood pressure; IMT, intima-media thickness; baPWV, brachial-ankle pulse wave velocity; CAVI, cardio-ankle vascular index; ABI, ankle-brachial pressure index; %ACA, percentile of aortic calcification area. Data are expressed as means ± standard deviation. Referred control ranges are baPWV lower than 14.0 m/s, CAVI <8.0 and ABI from 0.9 to 1.2 [15,16].

FMA ratio (<8.6) ( $0.72 \pm 0.09$  mm,  $n = 14$ ). In contrast, mean CA-IMT was the lowest in the group with the bottom tertile of AVFA (<40 cm<sup>2</sup>) and the highest tertile of TMA/FMA ratio ( $\geq 10.4$ ) ( $0.55 \pm 0.11$  mm,  $n = 17$ ) (Figure 4).

#### Determinants of markers of arteriosclerosis

Multiple stepwise regression analysis revealed that mean CA-IMT was independently associated with AVFA and TMA/FSA ratio (Table 4). TMA/FSA ratio was also independently correlated with baPWV, CAVI and ABI. In contrast, all of the anthropometric parameters did not associate with %ACA.

#### Discussion

In this study, we found that increased AVFA was independently associated with CA-IMT both in non-diabetic and

diabetic HD patients. ASFA was also positively correlated with CA-IMT in diabetic patients. TMA/FSA ratio, an indicator of muscle mass volume [2,12], was significantly and positively correlated with baPWV, CAVI and ABI in all patients, and it also correlated with CA-IMT in non-diabetic patients. When the patients were divided into the three groups according to their AVFA and TMA/FSA ratio, mean CA-IMT was most increased in the group with the top tertile of AVFA and the lowest tertile of TMA/FSA ratio. These findings suggest that both increased abdominal visceral adiposity and sarcopenia in the leg are independently associated with arteriosclerotic changes in HD patients.

It has been reported that AVFA is associated with CA-IMT, insulin resistance, and lipid abnormalities in HD patients [17–22]. Yamauchi *et al.* [17] first demonstrated that a higher AVFA is associated with greater carotid arteriosclerotic changes in 77 non-diabetic HD patients. They showed that carotid artery plaque score was positively cor-

**Table 2.** Correlation between AVFA and ASFA and clinical parameters in all non-diabetic and diabetic patients

| Characteristics        | All ( <i>n</i> = 161) |        | Non-DM ( <i>n</i> = 127) |        | DM ( <i>n</i> = 34) |       |
|------------------------|-----------------------|--------|--------------------------|--------|---------------------|-------|
|                        | AVFA                  | ASFA   | AVFA                     | ASFA   | AVFA                | ASFA  |
| Age                    | 0.00                  | -0.20* | -0.01                    | -0.20* | 0.00                | -0.21 |
| Time on HD             | -0.04                 | -0.18* | -0.03                    | -0.22* | 0.00                | -0.04 |
| Creatinine             | 0.28**                | 0.17*  | 0.31**                   | 0.22*  | 0.26                | -0.01 |
| Albumin                | -0.06                 | 0.01   | -0.04                    | 0.04   | -0.13               | -0.12 |
| Total cholesterol      | 0.09                  | 0.26** | 0.16                     | 0.37** | -0.11               | -0.10 |
| HDL cholesterol        | -0.31**               | -0.06  | -0.32**                  | -0.02  | -0.29               | -0.21 |
| LDL cholesterol        | 0.17*                 | 0.28** | 0.23**                   | 0.38** | -0.08               | -0.10 |
| Triglyceride           | 0.38**                | 0.22** | 0.45**                   | 0.26** | -0.15               | 0.06  |
| Prealbumin             | 0.19*                 | 0.19*  | 0.25**                   | 0.25** | 0.01                | 0.00  |
| Log-transformed hs-CRP | 0.26**                | 0.09   | 0.30**                   | 0.05   | 0.10                | 0.18  |
| Haemoglobin            | 0.18*                 | 0.05   | 0.26**                   | 0.07   | -0.02               | 0.01  |
| TMA                    | 0.22**                | 0.28** | 0.16                     | 0.26** | 0.47**              | 0.40* |
| TMA/FSA ratio          | 0.15                  | 0.28** | 0.08                     | 0.28** | 0.45**              | 0.31  |

Abbreviations: AVFA, abdominal visceral fat area; ASFA, abdominal subcutaneous fat area; TMA, thigh muscle area; FSA, femoral shaft area; HD, haemodialysis; Hs-CRP, highly sensitive C-reactive protein. Univariate correlations between anthropometric parameters with laboratory variables were tested using Spearman rank correlation coefficient for continuous variables. An asterisk and two asterisks denote  $P < 0.05$  and  $P < 0.01$ , respectively.

related with AVFA. Visceral adiposity is also a predictor of carotid-femoral PWV in peritoneal dialysis (PD) patients [18]. A close association of ASFA with insulin resistance [19–21] and increased CA-IMT [22] has been demonstrated in HD patients.

In the present study, we confirmed that AVFA is a significant indicator of CA-IMT both in non-diabetic and diabetic HD patients. ASFA was correlated with carotid arteriosclerosis in diabetic but not in non-diabetic patients. In contrast, abdominal adipose tissues did not associate with maximal

**(A) Non-DM (*n*=127)**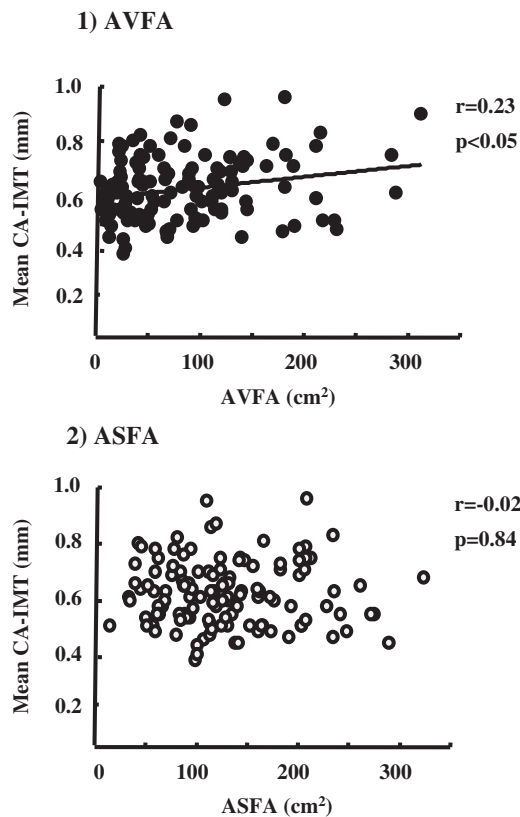**(B) DM (*n*=34)**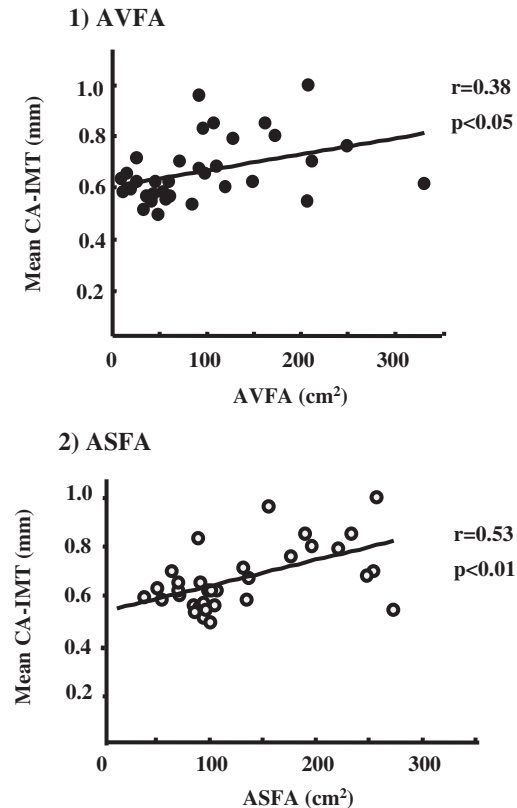

**Fig. 1.** Associations between abdominal subcutaneous and visceral fat mass and mean CA-IMT. AVFA was significantly and positively correlated with CA-IMT in non-diabetic ( $n = 127$ ) and diabetic HD patients ( $n = 34$ ). ASFA was also related to CA-IMT in diabetic patients. Abbreviations: DM, diabetes mellitus; AVFA, abdominal visceral fat mass area; ASFA, abdominal subcutaneous fat mass area; CA-IMT, carotid artery intima-media thickness.

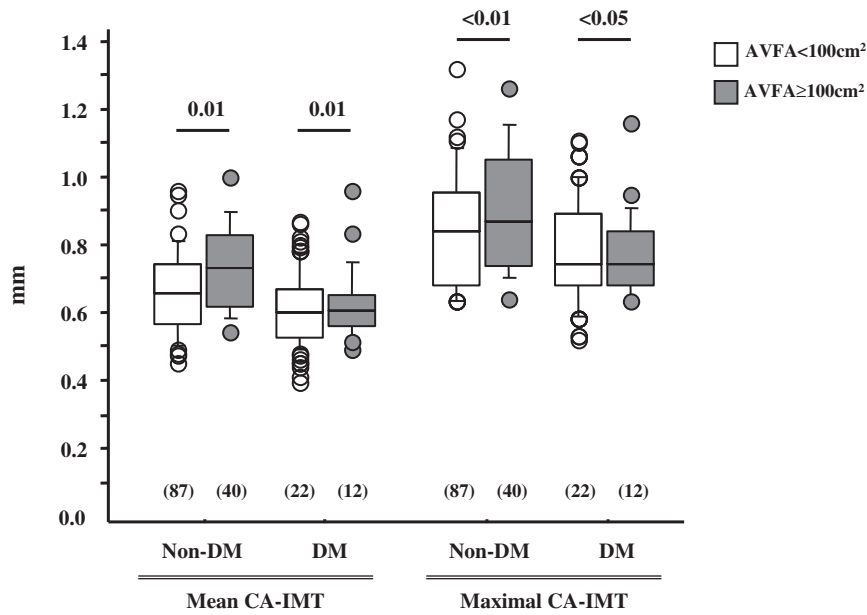

**Fig. 2.** Visceral adiposity and mean and maximal CA-IMT in non-diabetic and diabetic HD patients. Mean and maximal CA-IMT were significantly higher in both non-DM ( $n = 127$ ) and DM ( $n = 34$ ) patients with AVFA more than  $100 \text{ cm}^2$  when compared with those  $< 100 \text{ cm}^2$ . Data are presented as box plots. Differences between the two groups were analysed following one-way ANOVA by Bonferroni/Dunn test. The number of the patients in each category was shown in parentheses. Abbreviations: DM, diabetes mellitus; AVFA, abdominal visceral fat mass area; CA-IMT, carotid artery intima-media thickness.

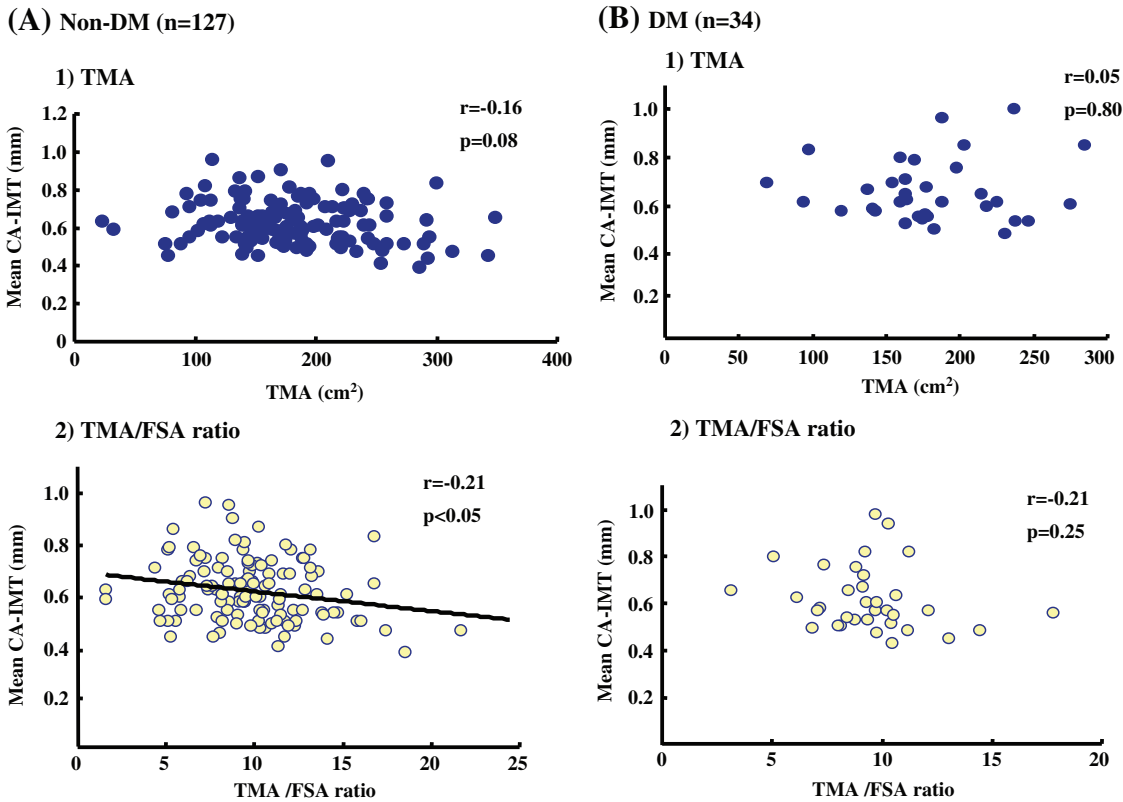

**Fig. 3.** Relationship between CA-IMT and thigh muscle mass area. TMA did not relate to CA-IMT both in non-diabetic ( $n = 127$ ) and diabetic ( $n = 34$ ) HD patients. TMA/FSA ratio was significantly and negatively correlated with CA-IMT in non-diabetic patients. Abbreviations: DM, diabetes mellitus; TMA, thigh muscle area; FSA, femoral shaft area; CA-IMT, carotid artery intima-media thickness.

**Table 3.** Association of body composition with markers of arteriosclerosis

| (A) All patients ( <i>n</i> = 161)          |               |               |              |              |
|---------------------------------------------|---------------|---------------|--------------|--------------|
|                                             | baPWV         | CAVI          | ABI          | %ACA         |
| AVFA                                        | -0.02 (0.85)  | 0.04 (0.68)   | 0.04 (0.70)  | -0.00 (0.96) |
| ASFA                                        | -0.01 (0.90)  | 0.08 (0.40)   | 0.02 (0.81)  | -0.05 (0.57) |
| TMA                                         | -0.18 (<0.05) | -0.09 (0.31)  | 0.19 (<0.05) | -0.12 (0.14) |
| TMA/FSA ratio                               | -0.19 (<0.05) | -0.20 (<0.05) | 0.25 (<0.01) | -0.07 (0.43) |
| (B) Non-diabetic patients ( <i>n</i> = 127) |               |               |              |              |
|                                             | baPWV         | CAVI          | ABI          | %ACA         |
| AVFA                                        | -0.08 (0.44)  | 0.03 (0.74)   | -0.04 (0.68) | 0.04 (0.69)  |
| ASFA                                        | -0.06 (0.56)  | 0.14 (0.18)   | -0.09 (0.36) | -0.04 (0.70) |
| TMA                                         | -0.18 (0.09)  | -0.10 (0.35)  | 0.21 (<0.05) | -0.09 (0.33) |
| TMA/FSA ratio                               | -0.13 (0.20)  | -0.14 (0.18)  | 0.28 (<0.01) | -0.01 (0.92) |
| (C) Diabetic patients ( <i>n</i> = 34)      |               |               |              |              |
|                                             | baPWV         | CAVI          | ABI          | %ACA         |
| AVFA                                        | 0.04 (0.84)   | -0.08 (0.71)  | 0.24 (0.23)  | -0.06 (0.74) |
| ASFA                                        | 0.10 (0.62)   | -0.09 (0.68)  | 0.32 (0.09)  | -0.09 (0.62) |
| TMA                                         | -0.24 (0.24)  | -0.14 (0.52)  | 0.17 (0.42)  | -0.28 (0.12) |
| TMA/FSA ratio                               | -0.41 (<0.05) | -0.41 (<0.05) | 0.17 (0.40)  | -0.33 (0.07) |

Abbreviations: AVFA, abdominal visceral fat area; ASFA, abdominal subcutaneous fat area; TMA, thigh muscle area; FSA, femoral shaft area; baPWV, brachial-ankle pulse wave velocity; CAVI, cardio-ankle vascular index; ABI, ankle-brachial pressure index; %ACA, percentile of aortic calcification area. Univariate correlations between anthropometric parameters with laboratory variables were tested using Spearman rank correlation coefficient for continuous variables. Data and parenthesis represent correlation coefficients and P-values between the two groups.

plaque diameter. Thus, it follows from these findings that accumulated abdominal adipose tissue may play a greater role in intima-medial thickening than in the development of atherosclerotic plaques in HD patients, as shown previously in the general population [3].

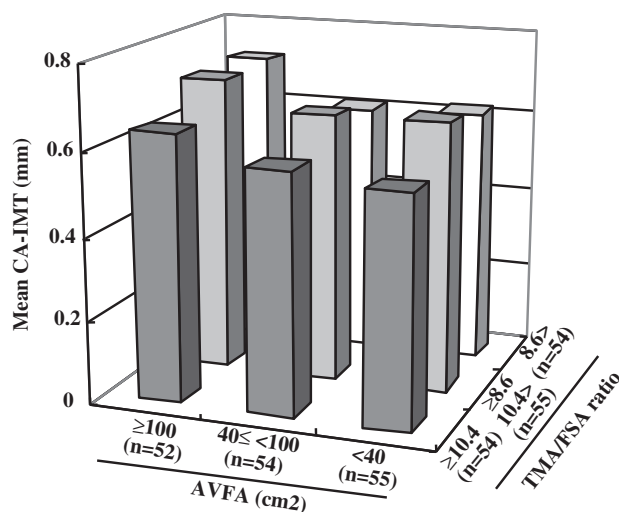

**Fig. 4.** Increased AVFA and reduced TMA/FSA ratio were independently associated with mean CA-IMT. When all patients were divided into the three groups according to their AVFA and TMA/FSA ratio, mean levels of CA-IMT were the most prominent in the group with the top tertile of AVFA ( $\geq 100$  cm<sup>2</sup>) and the bottom tertile of TMA/FSA ratio ( $< 8.6$ ) ( $0.71 \pm 0.17$  mm,  $n = 17$ ). In contrast, mean CA-IMT was the lowest in the group with the bottom tertile of AVFA ( $< 40$  cm<sup>2</sup>) and the highest tertile of TMA/FSA ratio ( $\geq 10.4$ ) ( $0.55 \pm 0.11$  mm,  $n = 14$ ). Abbreviations: CA-IMT, carotid artery intima-media thickness; AVFA, abdominal visceral fat mass area; TMA, thigh muscle area; FSA, femoral shaft area.

Recent investigations have suggested that a number of cytokines such as leptin, adiponectin, visfatin, tumour necrosis factor- $\alpha$  (TNF- $\alpha$ ) and interleukin-6 (IL-6) are produced by adipose tissues [16,23]. Abdominal visceral adipose tissue is demonstrated to be more associated with serum CRP and IL-6 than subcutaneous adipose tissue in the general population [24]. A close relationship between obesity and oxidative stress and inflammation is shown in patients with moderate to severe chronic CKD [25]. Increased abdominal fat deposition is also related to serum CRP and IL-6 in HD patients [26]. Visceral and subcutaneous adipose tissues measured by magnetic resonance imaging are associated with serum level of ceruloplasmin, an acute-phase reactant, in prevalent HD patients [27]. A recent study [28] also demonstrated that abdominal obesity (waist circumference  $\geq 94$  cm) underlies a high risk of all-cause and CV mortality in HD patients. In this study, we found that AVFA was positively correlated with log-transformed hs-CRP. Because abdominal fat tissue expresses higher amounts of proinflammatory cytokines in patients with end-stage renal disease (ESRD) than in control subjects [29], accumulated adipose tissue could be an important and universal part of the overall systemic inflammatory reaction, thereby leading to advanced arteriosclerotic changes in HD patients.

Decreased muscle mass is associated with physiological and functional impairment, eventually leading to increased mortality in most common diseases and conditions [30]. Lower muscle mass at upper and lower limbs is independently associated with worse survival in HD patients [31,32]. Urinary creatinine excretion rate, an indirect marker of whole muscle volume, is strongly associated with mortality in general outpatients with stable coronary arterial disease [33]. Recently, mid-thigh muscle cross-sectional area ad-

**Table 4.** Multiple regression analysis predicting markers of arteriosclerosis in 161 haemodialysis patients

| Variables                  | R <sup>2</sup> | Standard regression coefficient | SE    | F-to-remove | P value |
|----------------------------|----------------|---------------------------------|-------|-------------|---------|
| Parameters for mean CA-IMT |                |                                 |       |             |         |
| Age                        | 0.08           | 0.28                            | 7.20  | 13.36       | <0.01   |
| AVFA                       | 0.07           | 0.27                            | 43.96 | 12.56       | <0.01   |
| TMA/FSA ratio              | 0.05           | -0.21                           | 2.09  | 7.29        | <0.01   |
| HDL cholesterol            | 0.03           | -0.16                           | 10.15 | 4.22        | <0.05   |
| Parameters for baPWV       |                |                                 |       |             |         |
| MAP                        | 0.33           | 0.57                            | 0.56  | 59.34       | <0.01   |
| Age                        | 0.22           | 0.46                            | 0.34  | 33.17       | <0.01   |
| Diabetes                   | 0.06           | -0.24                           | 0.01  | 7.61        | <0.01   |
| Total cholesterol          | 0.05           | -0.23                           | 1.25  | 6.42        | <0.05   |
| TMA/SFA ratio              | 0.04           | -0.19                           | 0.10  | 4.57        | <0.05   |
| Parameters for CAVI        |                |                                 |       |             |         |
| MAP                        | 0.27           | 0.52                            | 0.65  | 45.58       | <0.01   |
| Age                        | 0.16           | 0.41                            | 0.39  | 24.09       | <0.01   |
| Diabetes                   | 0.14           | -0.38                           | 0.01  | 20.50       | <0.01   |
| TMA/SFA ratio              | 0.04           | -0.20                           | 0.11  | 5.23        | <0.05   |
| Creatinine                 | 0.04           | -0.20                           | 0.12  | 4.97        | <0.05   |
| Parameters for ABI         |                |                                 |       |             |         |
| Age                        | 0.06           | -0.25                           | 5.99  | 8.28        | <0.01   |
| TMA/FSA ratio              | 0.06           | 0.25                            | 1.68  | 8.04        | <0.01   |
| Creatinine                 | 0.03           | 0.18                            | 1.69  | 4.21        | <0.05   |
| Parameters for %ACA        |                |                                 |       |             |         |
| Age                        | 0.13           | 0.35                            | 0.04  | 20.55       | <0.01   |
| Triglyceride               | 0.04           | -0.19                           | 0.22  | 5.24        | <0.05   |
| Time on HD                 | 0.03           | 0.17                            | 0.04  | 4.32        | <0.05   |
| Calcium                    | 0.03           | 0.17                            | 0.003 | 4.29        | <0.05   |

Multiple stepwise regression analysis of variables including the followings: age, time on HD, diabetes, calcium, phosphorous, albumin, total cholesterol, HDL cholesterol, triglyceride, log-transformed C-reactive protein (CRP), intact parathyroid hormone, body mass index, mean arterial pressure (MAP), abdominal visceral fat area (AVFA), abdominal subcutaneous fat area (ASFA), thigh muscle area standardized for femoral shaft area (TMA/FSA ratio). Abbreviations: baPWV, brachial-ankle pulse wave velocity; CAVI, cardio-ankle vascular index; ABI, ankle-brachial pressure index; %ACA, percentile of aortic calcification area.

justed by body weight is shown as an independent predictor of baPWV in middle-age to elderly men [8]. In this study, we used the TMA/FSA ratio as a reliable marker to assess systemic muscle mass volume, because this ratio is well correlated with creatinine production in the spent dialysate [12] and estimated whole muscle mass volume calculated from creatinine kinetic model [34]. TMA is also negatively correlated with IL-6 and CRP in HD patients [35]. We first showed that TMA/FSA ratio was independently associated with CA-IMT, baPWV, CAVI and ABI, supporting a close association between reduced muscle mass and markers of arteriosclerosis in ESRD patients.

There are several potential reasons why low muscle mass may be associated with arteriosclerotic changes in dialysis patients. Firstly, since TMA/FSA ratio was well correlated with serum albumin and prealbumin, low muscle mass in the thigh may reflect poor nutritional status. Secondly, skeletal muscle is the main site for insulin-mediated glucose disposal, so low muscle mass volume may be associated with insulin resistance. Thirdly, decreased muscle mass of the leg links to low physical activity, which may lead to the promotion of arteriosclerosis.

In this study, both increased visceral adiposity and decreased thigh muscle volume are independently associated with markers of arteriosclerosis independently of the confounding factors related to arteriosclerosis. Mean CA-IMT was increased most prominently in patients with the top tertile of AVFA ( $\geq 100 \text{ cm}^2$ ) and the bottom tertile

of TMA/FSA ratio ( $< 8.6$ ) (Figure 4). In this group, ABI was also lowest ( $0.97 \pm 0.18$ ), and baPWV was highest ( $14.9 \pm 3.1 \text{ m/s}$ ) when compared with other groups (data not shown). An association of increased visceral adiposity and altered thigh muscle composition with intramuscular fat infiltration is observed in HD patients with sleep apnoea syndrome [36]. Protein wasting can also be present in obese patients and is associated with inflammation and poor survival in HD patients [37]. So, decreased muscle mass, increased visceral fat and arteriosclerosis may share a common pathway, i.e. chronic low-grade inflammation, and may interact with each other in ESRD patients.

Recently, Golledge *et al.* [38] showed a 6-fold increase in the odds of abdominal aortic calcification in the upper compared with the lower tertile of the visceral adipose tissue in 148 patients with peripheral arterial disease. However, a large community-based study [39] failed to show any association of abdominal subcutaneous and visceral adipose tissue with aortic calcification when adjusted for multivariate in the general population. In this study, AVFA, ASFA and TMA/FSA ratio did not associate with %ACA. In contrast, age and triglyceride became independent indicators of %ACA (Table 4), confirming that classical risk factors contribute to aortic calcification in HD patients.

In the present study, mean BMI ( $20.7 \pm 2.8 \text{ kg/m}^2$ ) was much lower than those in North American and European countries. However, our mean of BMI is compar-



able to that ( $20.9 \pm 3.2 \text{ kg/m}^2$ ) in Japanese HD patients in the Dialysis Outcomes and Practice Pattern Study (DOPPS) III [40]. In DOPPS III, the interactions between nutritional parameters on risk of death were almost identical among Europe, North America and Japan despite the substantial variations across countries. So, our results could be, for the most part, generalizable to maintenance HD patients.

There are several limitations to the present study. Firstly, its cross-sectional design of the study did not allow us to determine causality. Secondly, the relatively low number of patients in a single HD centre may not provide enough statistical power to avoid the existence of confounding variables. Finally, since we conducted CT scan before HD session, we could not completely exclude the influence of hydration state on CT anthropometrics.

## Conclusion

In summary, we showed that abdominal visceral fat mass is associated with carotid intima-medial thickening in HD patients. Abdominal visceral adiposity is positively correlated with hs-CRP. Subcutaneous fatness also correlates with mean CA-IMT in diabetic patients. Furthermore, reduced thigh muscle mass area is related to baPWV, CAVI and ABI in addition to CA-IMT. Our findings suggest that TMA/FSA ratio may be a novel anthropometric marker to take into account when assessing arteriosclerotic changes in ESRD patients. Further prospective studies will be needed to test whether TMA/FSA ratio is useful in predicting progression of arteriosclerosis, cardiovascular events and mortality in CKD patients.

**Acknowledgement.** This study is partly supported by a research grant in 2010 from the Japanese Association of Dialysis Physicians.

**Conflict of interest statement.** None declared.

## References

- Odamaki M, Furuya R, Ohkawa S *et al.* Altered abdominal fat distribution and its association with the serum lipid profile in non-diabetic haemodialysis patients. *Nephrol Dial Transplant* 1999; 14: 2427–2432
- Ohkawa S, Odamaki M, Ikegaya N *et al.* Association of age with muscle, mass, fat mass and fat distribution in non-diabetic haemodialysis patients. *Nephrol Dial Transplant* 2005; 20: 945–951
- Lear SA, Humphries KH, Kohli S *et al.* Visceral adipose tissue, a potential risk factor for carotid atherosclerosis. Results of the Multicultural Community Health Assessment Trial (M-CHAT). *Stroke* 2007; 38: 2422–2429
- Konishi K, Nakano S, Seto H *et al.* Carotid atherosclerosis mediated by visceral adiposity and adipocytokines in type 2 diabetic subjects. *Diabetes Res Clin Pract* 2009; 85: 171–178
- Fantin F, Di Francesco V, Rossi A *et al.* Abdominal obesity and subclinical vascular damage in the elderly. *J Hypertens* 2010; 28: 333–339
- Tabara Y, Igase M, Kido T *et al.* Composition of lower extremity in relation to a high ankle-brachial index. *J Hypertens* 2009; 27: 167–173
- Debette S, Leone N, Courbon D *et al.* Calf circumference is inversely associated with carotid plaques. *Stroke* 2008; 39: 2958–2965
- Ochi M, Kihara K, Tabara Y *et al.* Arterial stiffness is associated with low thigh muscle mass in middle-aged to elderly men. *Atherosclerosis* 2010; 212: 327–332
- Mafra D, Guebre-Egziabher F, Fouque D. Body mass index, muscle and fat in chronic kidney disease: questions about survival. *Nephrol Dial Transplant* 2008; 23: 2461–2466
- Nishizawa Y, Shoji T, Ishimura E. Body composition and cardiovascular risk in hemodialysis patients. *J Ren Nutr* 2006; 16: 241–244
- Odamaki M, Furuya R, Kinumura Y *et al.* Association between plasma adiponectin concentration and visceral fat accumulation in hemodialysis patients. *Nephron Clin Pract* 2006; 102: c8–c13
- Ohkawa S, Odamaki M, Yoneyama T *et al.* Standardized thigh muscle area measured by computed axial tomography as an alternate muscle mass index for nutritional assessment of hemodialysis patients. *Am J Clin Nutr* 2000; 71: 485–490
- Odamaki M, Shibata T, Takita T *et al.* Serum fetuin-A and aortic calcification in hemodialysis patients. *Kidney Int* 2005; 67: 2915
- Kato A, Takita T, Maruyama Y *et al.* Impact of carotid atherosclerosis on long-term mortality in chronic hemodialysis patients. *Kidney Int* 2003; 64: 1472–1479
- Kato A, Takita T, Furuhashi M *et al.* A small reduction in the ankle-brachial index is associated with increased mortality in patients on chronic hemodialysis. *Nephron Clin Pract* 2010; 114: c29–c37
- Kato A, Odamaki M, Ishida J *et al.* Association of high-molecular-weight to total adiponectin ratio with pulse wave velocity in hemodialysis patients. *Nephron Clin Pract* 2008; 109: c18–c24
- Yamauchi T, Kuno T, Takada H *et al.* The impact of visceral fat on multiple risk factors and carotid atherosclerosis in chronic haemodialysis patients. *Nephrol Dial Transplant* 2003; 18: 1842–1847
- Lu Q, Cheng LT, Wang T *et al.* Visceral fat, arterial stiffness, and endothelial function in peritoneal dialysis patients. *J Renal Nutr* 2008; 18: 495–502
- Sakkas GK, Karatzaferi C, Zintzaras E *et al.* Liver fat, visceral adiposity, and sleep disturbances contribute to the development of insulin resistance and glucose intolerance in nondiabetic dialysis patients. *Am J Physiol Regul Integr Comp Physiol* 2008; 295: R1721–R1729
- Tsushima M, Terayama Y, Momose A *et al.* Progression of atherosclerosis in hemodialysis patients: effect of adiponectin on carotid intima media thickness. *J Atheroscler Thromb* 2008; 15: 213–218
- Gohda T, Gotoh H, Tanimoto M *et al.* Relationship between abdominal fat accumulation and insulin resistance in hemodialysis patients. *Hypertens Res* 2008; 31: 83–88
- Gotoh H, Gohda T, Tanimoto M *et al.* Contribution of subcutaneous fat accumulation to insulin resistance and atherosclerosis in haemodialysis patients. *Nephrol Dial Transplant* 2009; 24: 3474–3480
- Iglesias P, Diez JJ. Adipose tissue in renal disease: clinical significance and prognostic implications. *Nephrol Dial Transplant* 2010; 25: 2066–2077
- Pou KM, Massaro JM, Hoffmann U *et al.* Visceral and subcutaneous adipose tissue volumes are cross-sectionally related to markers of inflammation and oxidative stress. The Framingham Heart Study. *Circulation* 2007; 116: 1234–1241
- Ramos LF, Shintani A, Ikizler TA *et al.* Oxidative stress and inflammation are associated with adiposity in moderate to severe CKD. *J Am Soc Nephrol* 2008; 19: 593–599
- Cordeiro AC, Qureshi R, Stenvinkel P *et al.* Abdominal fat deposition is associated with increased inflammation, protein-energy wasting and worse outcome in patients undergoing haemodialysis. *Nephrol Dial Transplant* 2010; 25: 562–568
- Kaysen GA, Kotanko P, Zhu F *et al.* Relationship between adiposity and cardiovascular risk factors in prevalent hemodialysis patients. *J Renal Nutr* 2009; 19: 357–364
- Postorino M, Marino C, Tripepi G *et al.* Abdominal obesity and all-cause and cardiovascular mortality in end-stage renal disease. *J Am Coll Cardiol* 2009; 53: 1265–1272
- Roubicek T, Bartlova M, Krajickova J *et al.* Increased production of proinflammatory cytokines in adipose tissue of patients with end-stage renal disease. *Nutrition* 2009; 25: 762–768
- Wolfe R. The underappreciated role of muscle in health and disease. *Am J Clin Nutr* 2006; 84: 475–482

31. Huang CX, Tighiouart H, Beddhu S *et al.* Both low muscle mass and low fat are associated with higher all-cause mortality in hemodialysis patients. *Kidney Int* 2010; 77: 624–629
32. Kato A, Odamaki M, Yamamoto T *et al.* Influence of body composition on 5 year mortality in patients on regular haemodialysis. *Nephrol Dial Transplant* 2003; 18: 333–340
33. Ix JH, de Boer IH, Wassel CL *et al.* Urinary creatinine excretion rate and mortality in persons with coronary artery disease. The Heart and Soul Study. *Circulation* 2010; 121: 1295–1303
34. Kaizu Y, Ohkawa S, Kumagai H. Muscle mass index in haemodialysis patients: a comparison of indices obtained by routine clinical examinations. *Nephrol Dial Transplant* 2002; 17: 442–448
35. Kaizu Y, Ohkawa S, Odamaki M *et al.* Association between inflammatory mediators and muscle mass in long-term hemodialysis patients. *Am J Kidney Dis* 2003; 42: 295–302
36. Sakkas GK, Gourgourlianis KI, Karatzaferi C *et al.* Haemodialysis patients with sleep apnoea syndrome experience increased central adiposity and altered muscular composition and functionality. *Nephrol Dial Transplant* 2008; 23: 336–344
37. Honda H, Qureshi AR, Axelsson J *et al.* Obese sarcopenia in patients with end-stage renal disease is associated with inflammation and increased mortality. *Am J Clin Nutr* 2007; 86: 633–638
38. Golledge J, Jayalath R, Oliver L *et al.* Relationship between CT anthropometric measurements, adipokines and abdominal aortic calcification. *Atherosclerosis* 2008; 197: 428–434
39. Fox CS, Hwang SJ, Massaro JM *et al.* Relation of subcutaneous and visceral adipose tissue to coronary and abdominal aortic calcium (from the Framingham heart Study). *Am J Cardiol* 2009; 104: 543–547
40. Lopess AA, Bragg-Gresham JL, Elder SJ *et al.* Independent and joint associations of nutritional status indicators with mortality risk among chronic hemodialysis patients in the Dialysis Outcomes and Practice Patterns Study (DOPPS). *J Renal Nutr* 2010; 20: 224–234

Received for publication: 22.7.10; Accepted in revised form: 30.9.10

*Nephrol Dial Transplant* (2011) 26: 1976–1983

doi: 10.1093/ndt/gfq681

Advance Access publication 5 November 2010

## Restless legs syndrome enhances cardiovascular risk and mortality in patients with end-stage kidney disease undergoing long-term haemodialysis treatment

Gaetano La Manna<sup>1</sup>, Fabio Pizza<sup>2</sup>, Elisa Persici<sup>1</sup>, Olga Baraldi<sup>1</sup>, Giorgia Comai<sup>1</sup>, Maria Laura Cappuccilli<sup>1</sup>, Francesca Centofanti<sup>1</sup>, Elisa Carretta<sup>3</sup>, Giuseppe Plazzi<sup>2</sup>, Luigi Coli<sup>1</sup>, Pasquale Montagna<sup>2</sup> and Sergio Stefoni<sup>1</sup>

<sup>1</sup>Nephrology Dialysis and Renal Transplantation Unit, <sup>2</sup>Department of Neurological Sciences and <sup>3</sup>Department of Medicine and Public Health, University of Bologna, Italy

Correspondence and offprint requests to: Gaetano La Manna; E-mail: gaetano.lamanna@unibo.it

### Abstract

**Background.** Restless legs syndrome (RLS) is a sensorimotor neurological disorder characterized by paraesthesia, dysaesthesia and the irresistible urge to move the legs especially at night. Its prevalence is much higher among dialysis patients at 12 to 62% compared to 3 to 9% in the general population. Here, we investigated the association between RLS and cardiovascular events risk and laboratory parameters in end-stage kidney disease (ESKD) patients on dialysis.

**Methods.** One hundred ESKD patients undergoing haemodialysis were enrolled in an 18-month prospective observational study. The main outcomes were the associations of RLS with new cardiovascular events and cardiovascular mortality.

**Results.** RLS affected 31% of the study population. It was associated with female gender, gradual reduction in residual diuresis, lower albumin ( $P = 0.039$ ) and inflam-

mation, but not the dialysis parameters Kt/V and URR. During observation, 47% of patients experienced new cardiovascular events (64.5% with and 39.1% without RLS;  $P = 0.019$ ). New cardiovascular events increased with severity of RLS [intermittent (I-RLS) vs continuous (C-RLS)]. Mortality was 20.0% in all patients, 32.3% in those with and 14.5% in patients without RLS ( $P = 0.04$ ). In patients with I-RLS, mortality was 23.8% compared to 55.6% in patients with C-RLS ( $P = 0.014$ ). Multivariate analysis confirmed the relationship between RLS and mortality.

**Conclusions.** This study confirmed the high prevalence of RLS among dialysis patients and the associations between the severity of RLS and the risk of new cardiovascular events and higher short-term mortality.

**Keywords:** cardiovascular outcome; haemodialysis; mortality; restless legs syndrome
